# Supplementary material for: Protein Interaction Map of APOBEC3 Enzyme Family Reveals Deamination-Independent Role in Cellular Function
Source: PubMed Central journal article supplement — Mol Cell Proteomics. 2024 Mar 27;23(5):100755. doi: 10.1016/j.mcpro.2024.100755 (PMC11070599; doi:10.1016/j.mcpro.2024.100755), 2024-03-27

**A**

|           |   |    |    |   |    |    |
|-----------|---|----|----|---|----|----|
| A3B-HA    | - | -  | -  | - | -  | -  |
| A3D-HA    | - | -  | -  | - | -  | -  |
| A3F-HA    | - | -  | -  | - | -  | -  |
| A3G-HA    | - | -  | -  | - | -  | -  |
| PFD3-FLAG | + | -  | +  | - | +  | -  |
| PFD5-FLAG | - | +  | -  | + | -  | +  |
| RNAse A   | - | -  | -  | - | +  | +  |
| Treatment | L | IP | IP | L | IP | IP |

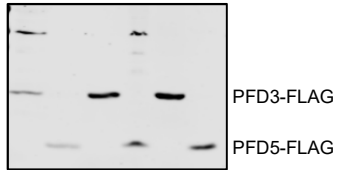**B**

|           |   |    |    |   |    |    |   |    |    |   |    |    |
|-----------|---|----|----|---|----|----|---|----|----|---|----|----|
| A3B-HA    | + | +  | +  | - | -  | -  | - | -  | -  | - | -  |    |
| A3D-HA    | - | -  | -  | + | +  | +  | - | -  | -  | - | -  |    |
| A3F-HA    | - | -  | -  | - | -  | -  | + | +  | +  | - | -  |    |
| A3G-HA    | - | -  | -  | - | -  | -  | - | -  | -  | + | +  | +  |
| PFD3-FLAG | - | -  | -  | - | -  | -  | - | -  | -  | - | -  |    |
| PFD5-FLAG | - | -  | -  | - | -  | -  | - | -  | -  | - | -  |    |
| RNAse A   | - | +  | -  | - | +  | -  | - | +  | -  | - | +  | -  |
| Treatment | L | IP | IP |

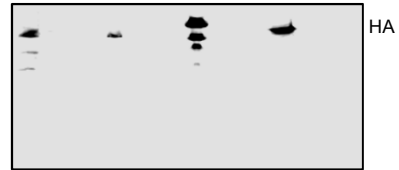

Supplement: mmc9.pdf [file mmc9.pdf]
