# Supplementary figures and images for: Protein Interaction Map of APOBEC3 Enzyme Family Reveals Deamination-Independent Role in Cellular Function
Source: PubMed Central journal article supplement — Mol Cell Proteomics. 2024 Mar 27;23(5):100755. doi: 10.1016/j.mcpro.2024.100755 (PMC11070599; doi:10.1016/j.mcpro.2024.100755), 2024-03-27

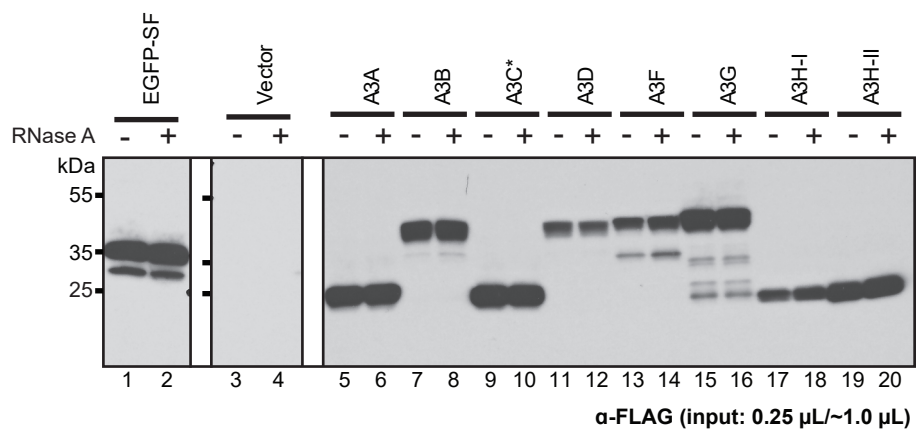

Supplement: mmc1.pdf [file mmc1.pdf]

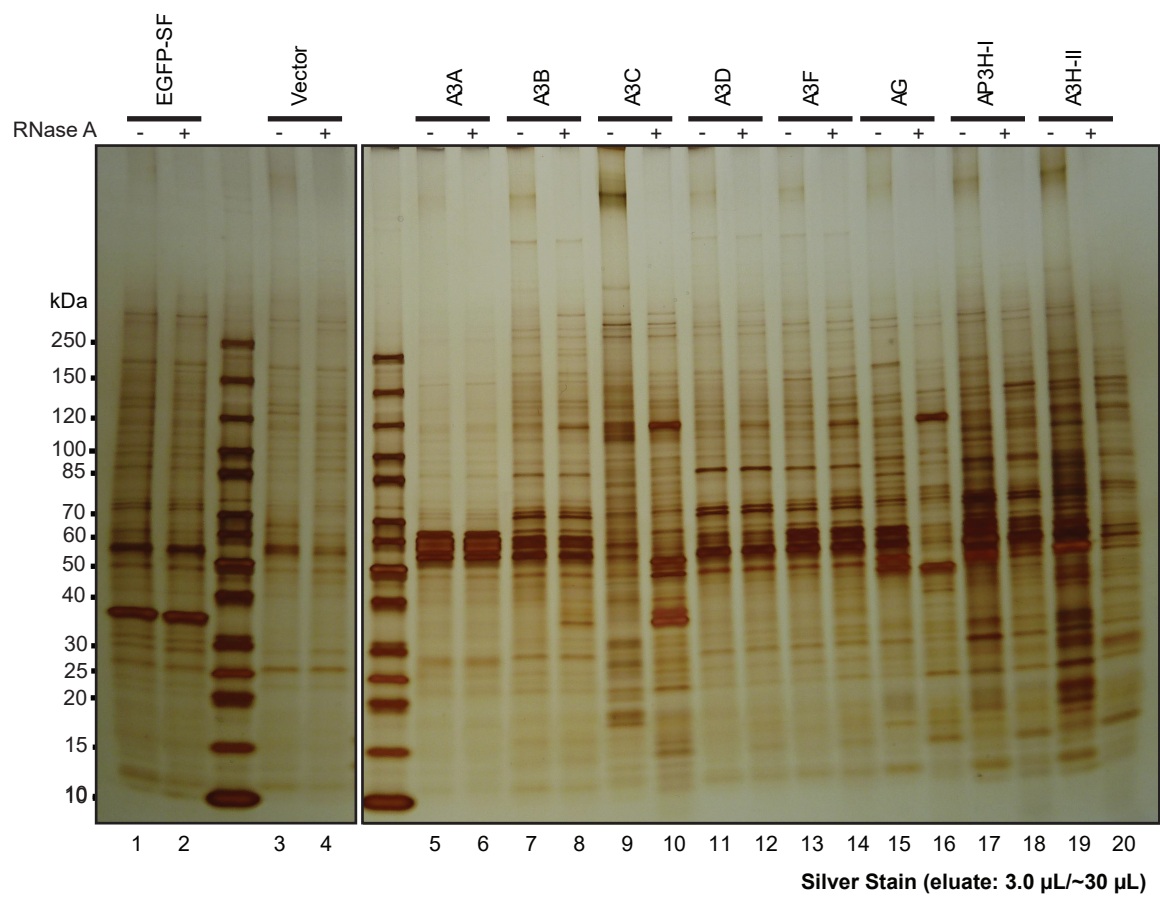

Supplement: mmc2.pdf [file mmc2.pdf]

# SAINT BFDR < 0.05 Thresholded PPI Network

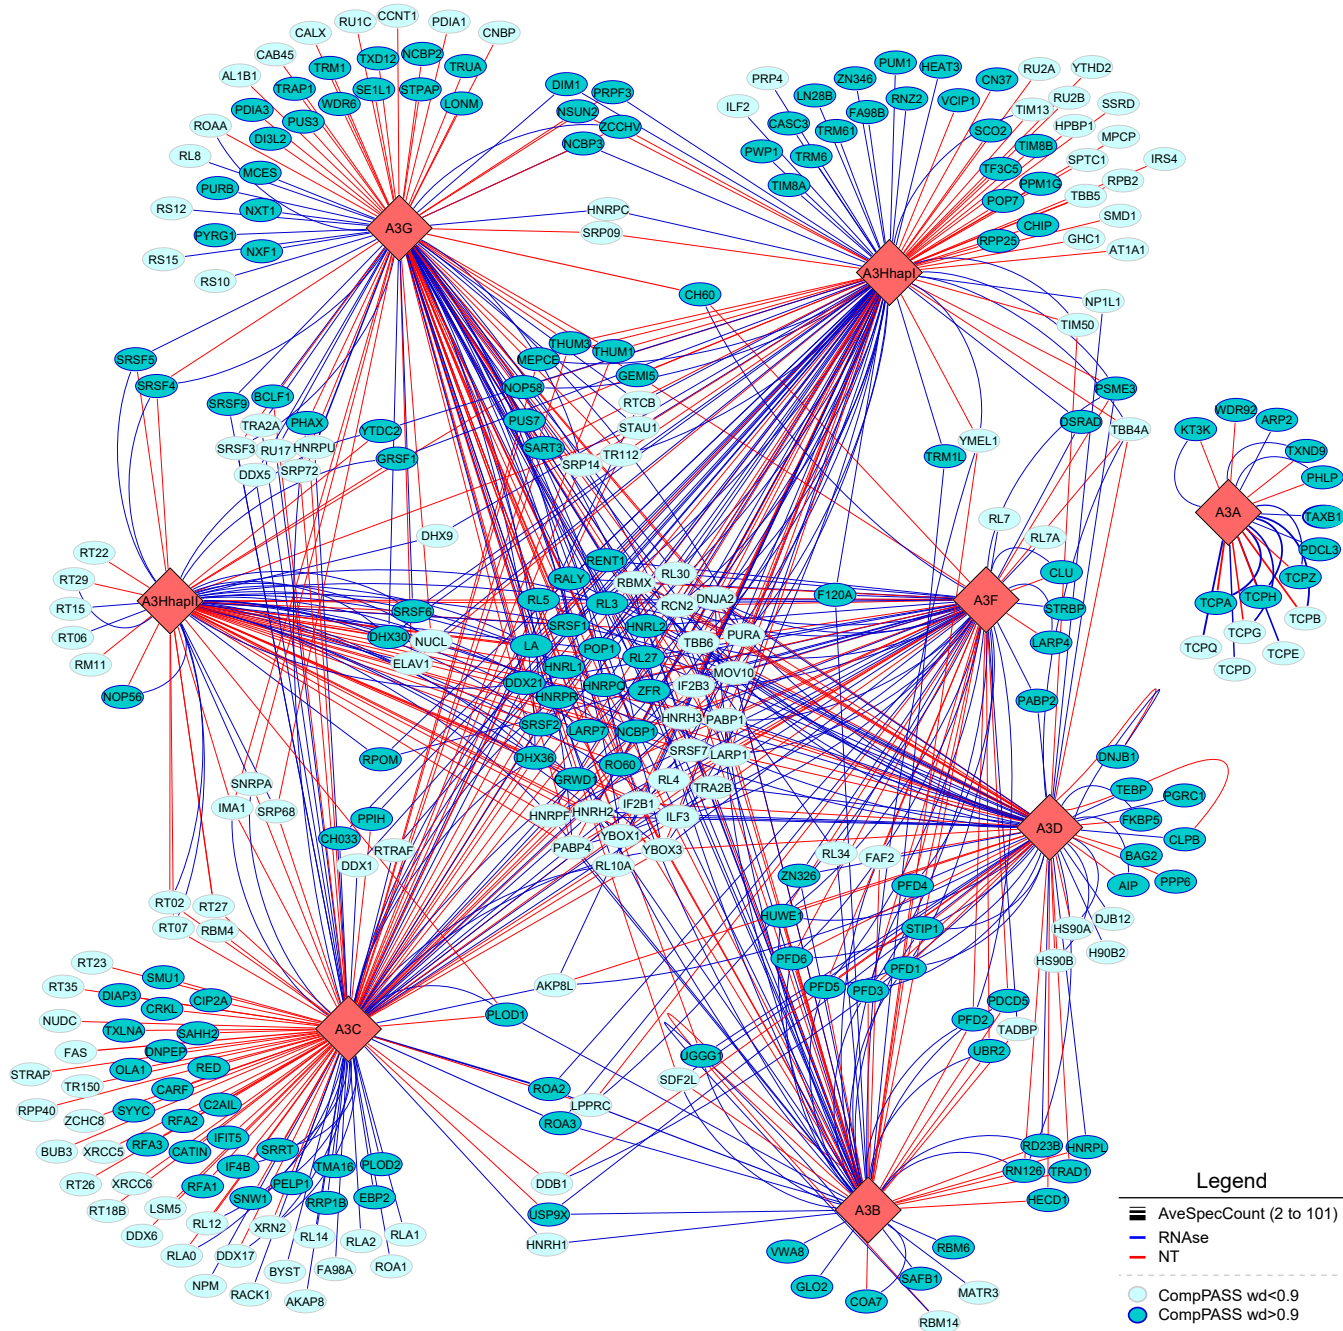

Supplement: mmc3.pdf [file mmc3.pdf]

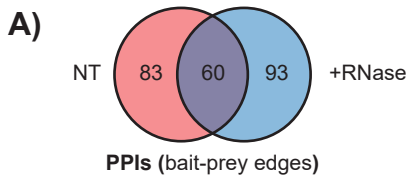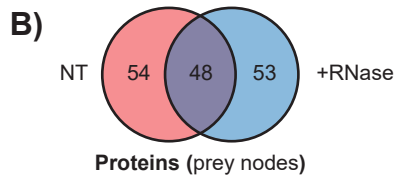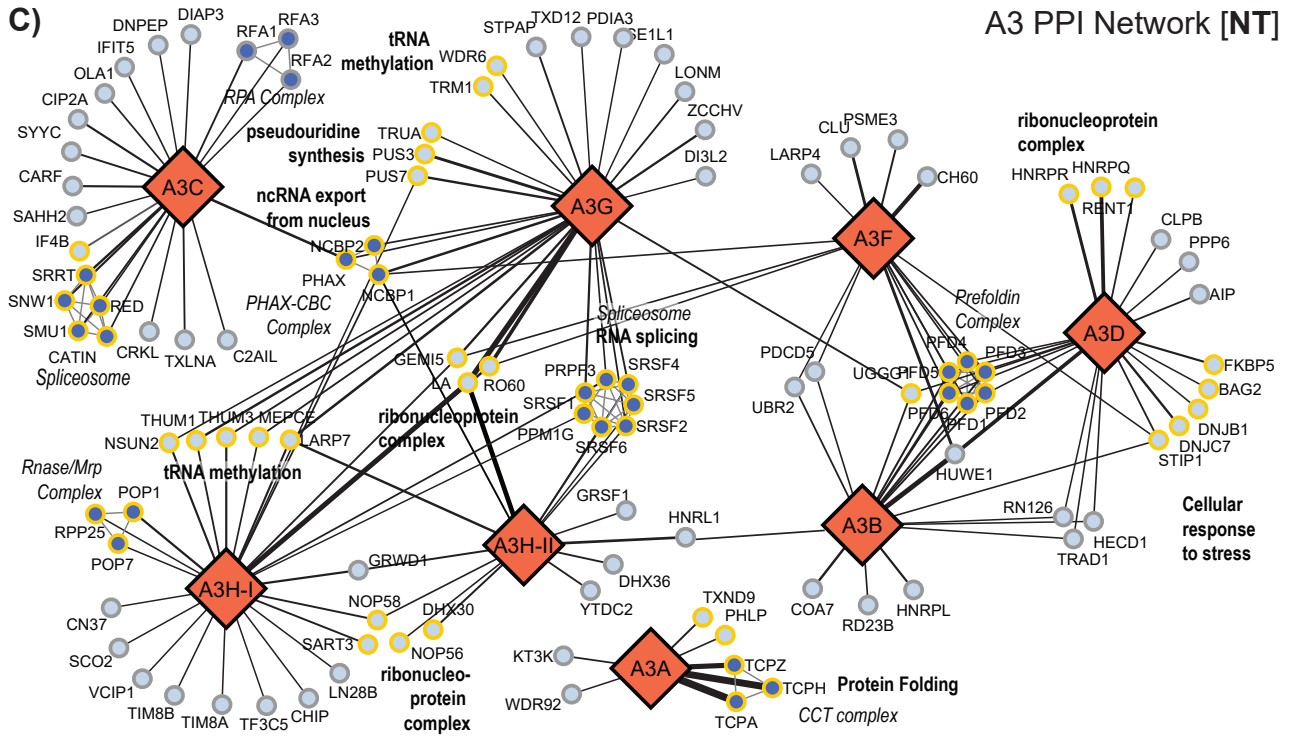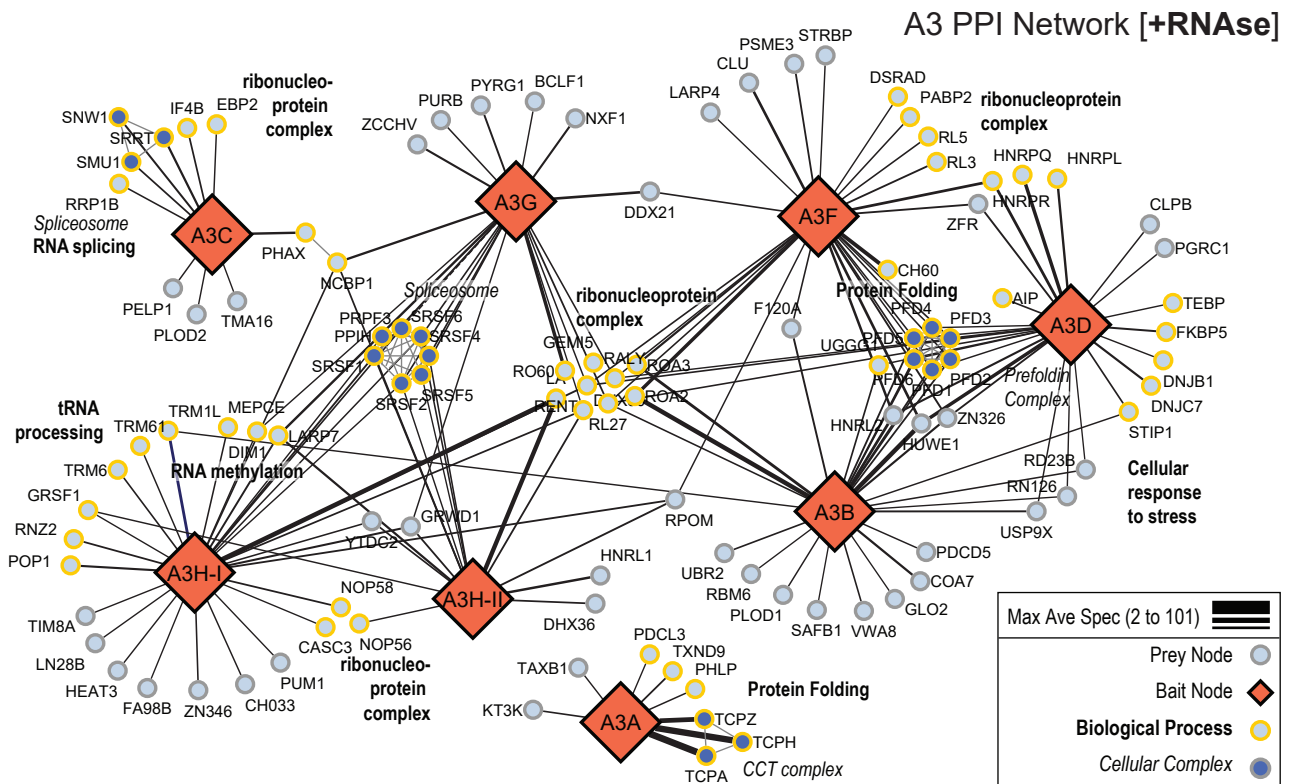

Supplement: mmc4.pdf [file mmc4.pdf]

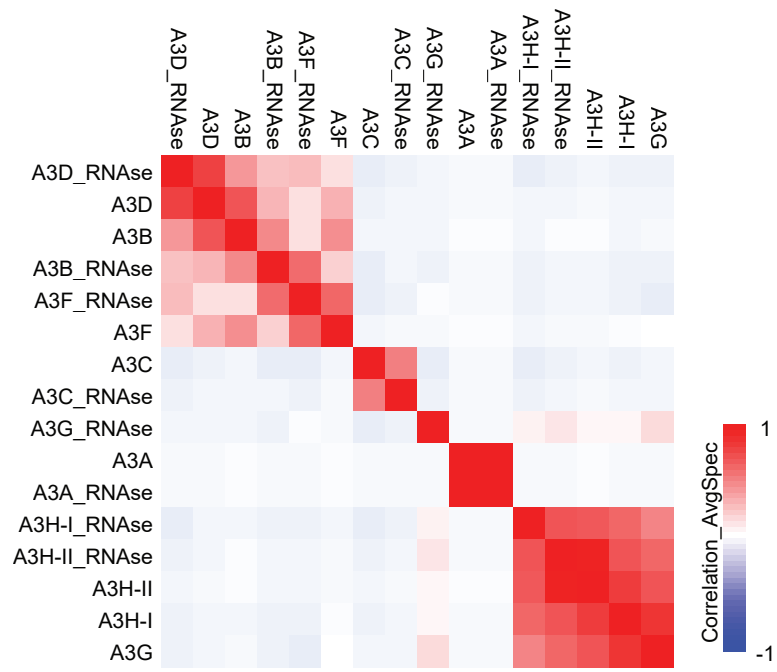

Supplement: mmc5.pdf [file mmc5.pdf]

Scatter plot of DIS vs. log2FC (NT/RNase+)

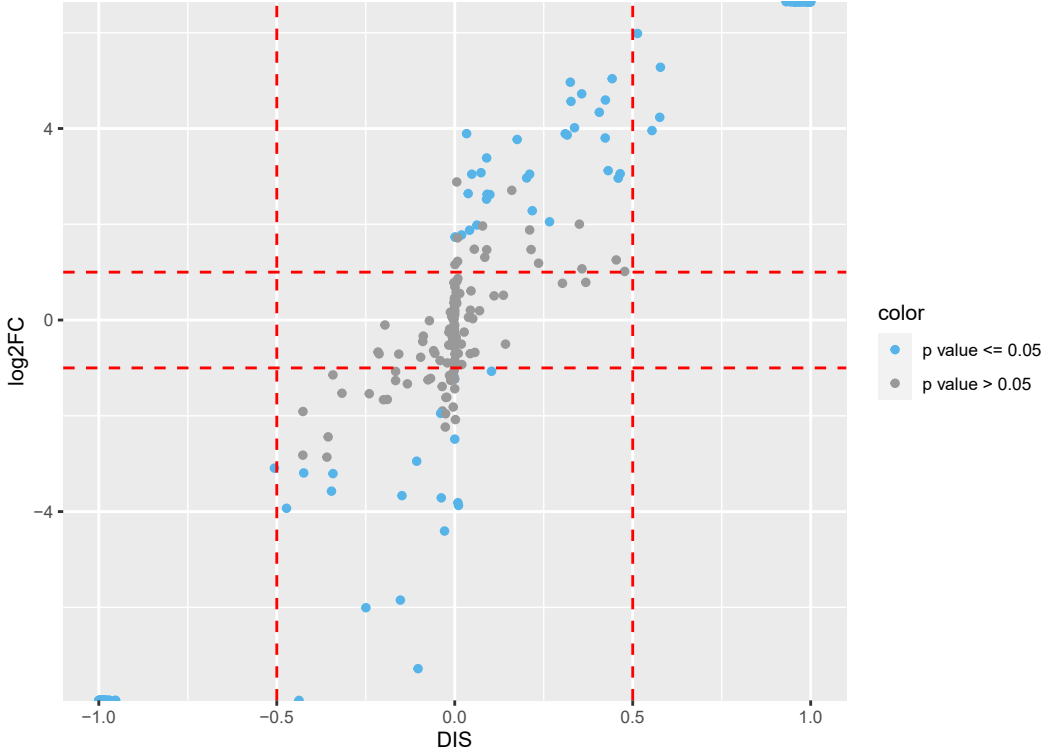

Supplement: mmc6.pdf [file mmc6.pdf]

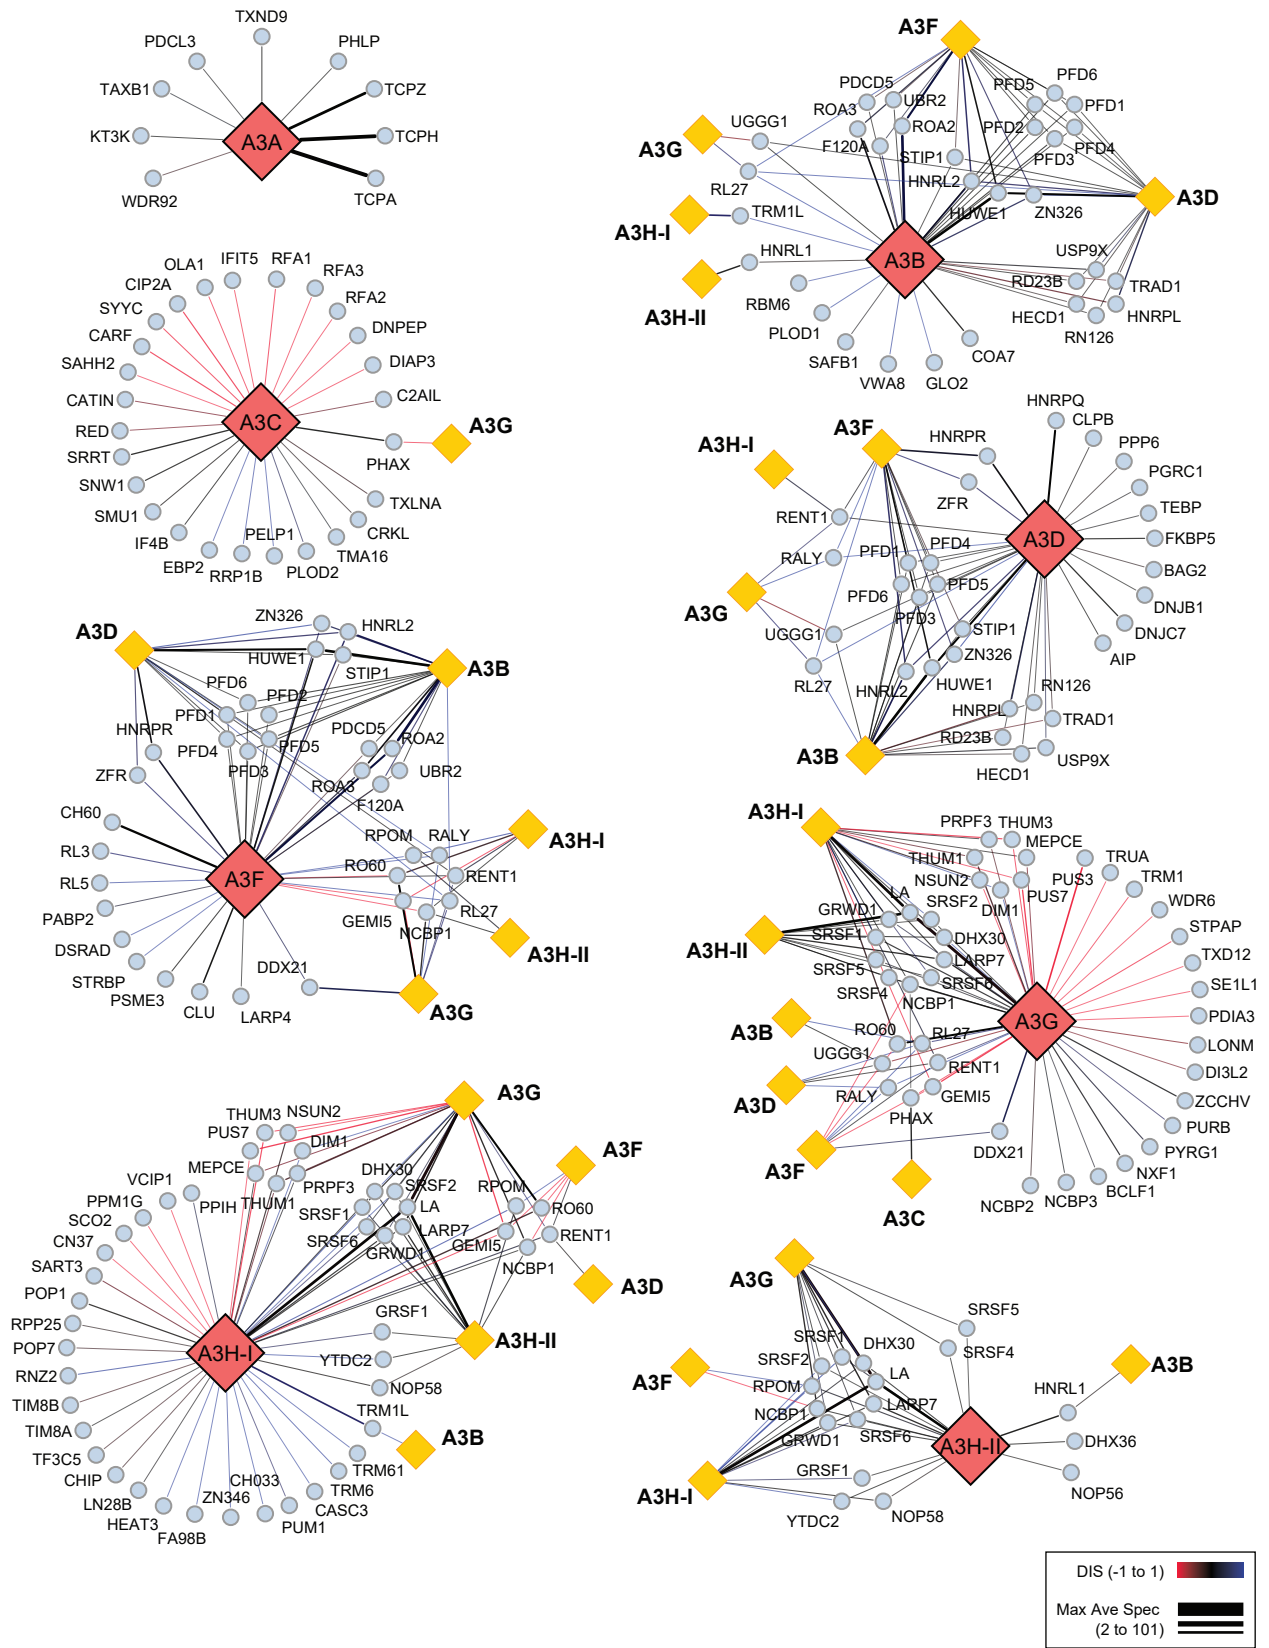

Supplement: mmc7.pdf [file mmc7.pdf]

**A**

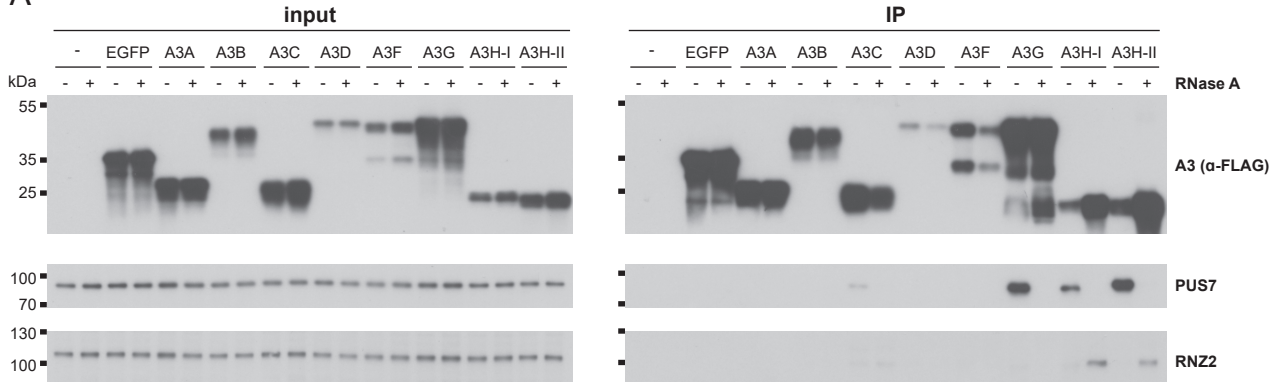

**B**

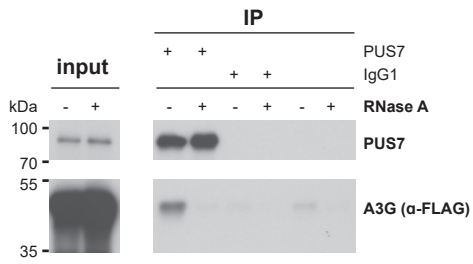

Supplement: mmc8.pdf [file mmc8.pdf]
